# Supplementary material
Source: publisher figshare collection journal article supplement (https://tandf.figshare.com/articles/dataset/_/14825767)
Supplement: Supplementary file 2 [file 1]

**Lucian P. Jiga, MD**

Director  
Department for Plastic, Reconstructive and Hand Surgery  
Evangelisches Krankenhaus  
Medical Campus, University of Oldenburg

Steinweg 13-17  
26122 Oldenburg  
Germany

Tel: +49 1726876893  
Email: [jigalucian@gmail.com](mailto:jigalucian@gmail.com)

**TO:**

**Marc Basson, MD, PhD, MBA**  
Editor-in-Chief, Journal of Investigative Surgery  
Senior Associate Dean for Medicine and Research  
University of North Dakota

**COVER LETTER**

02.03.2021

Dear Dr. Basson,

The authors of the article entitled:

*“ Role of the cadaver lab in lymphatic microsurgery education: Validation of a new training model.”*

wish to submit the above mentioned work for publication as Original Article in the category Education/Surgical Technique of the Journal of Investigative Surgery. All the authors have read this journal's Guide for Authors, are aware and agree with the presented data. This paper has not been either submitted, considered for publication or published simultaneously elsewhere.



Lucian Jiga, MD  
Corresponding Author
