# Supplementary material
Source: publisher figshare collection journal article supplement (https://tandf.figshare.com/articles/dataset/_/14825767)
Supplement: Supplementary file 3 [file 1]

| The Dundee Ready Education Environment (DREEM) scoring questionnaire |                                                                                                                                                                                   |
|----------------------------------------------------------------------|-----------------------------------------------------------------------------------------------------------------------------------------------------------------------------------|
| <b>Q1</b>                                                            | I am encouraged to participate in discussing questions and topics                                                                                                                 |
| <b>Q2</b>                                                            | The teaching is sufficiently concerned to develop my confidence                                                                                                                   |
| <b>Q3</b>                                                            | The teacher encourages me to be an active learner                                                                                                                                 |
| <b>Q4</b>                                                            | The teaching is well focused                                                                                                                                                      |
| <b>Q5</b>                                                            | The teaching is sufficiently concerned to develop my competence                                                                                                                   |
| <b>Q6</b>                                                            | I am clear about the learning objectives of each exercise                                                                                                                         |
| <b>Q7</b>                                                            | The teaching is often stimulating                                                                                                                                                 |
| <b>Q8</b>                                                            | The models used are appropriate for teaching                                                                                                                                      |
| <b>Q9</b>                                                            | The teaching is student centered                                                                                                                                                  |
| <b>Q10</b>                                                           | Long-term learning potential and hints are emphasised for each model                                                                                                              |
| <b>Q11*</b>                                                          | The teaching is too teacher-centered                                                                                                                                              |
| <b>Q12</b>                                                           | The teaching over-emphasises factual learning                                                                                                                                     |
| <b>Q13</b>                                                           | The teachers are good in providing feedback to students                                                                                                                           |
| <b>Q14</b>                                                           | The teachers have good communication skills with students                                                                                                                         |
| <b>Q15</b>                                                           | The teachers are knowledgeable                                                                                                                                                    |
| <b>Q16</b>                                                           | The teachers give clear examples                                                                                                                                                  |
| <b>Q17</b>                                                           | The teachers are well prepared for their practical demonstrations & talks                                                                                                         |
| <b>Q18</b>                                                           | The teachers provide constructive criticism                                                                                                                                       |
| <b>Q19*</b>                                                          | The teachers ridicule the students                                                                                                                                                |
| <b>Q20*</b>                                                          | The teachers get angry during the practical and/or theoretical sessions                                                                                                           |
| <b>Q21</b>                                                           | The teachers are authoritarian                                                                                                                                                    |
| <b>Q22</b>                                                           | The teachers are patient with the students                                                                                                                                        |
| <b>Q23*</b>                                                          | Students irritate the teachers, provoking them to improperly react                                                                                                                |
| <b>Q24</b>                                                           | I was able to memorise all informations I needed                                                                                                                                  |
| <b>Q25</b>                                                           | Much of what I had to learn during the course seemed relevant for performing lymphatic surgery in the future                                                                      |
| <b>Q26</b>                                                           | After the course I felt I moved a step forward to my 1st clinical case for lymphatic surgery                                                                                      |
| <b>Q27</b>                                                           | My previous microsurgical training was an advantage for the efficacy of learning during this course                                                                               |
| <b>Q28</b>                                                           | My problem solving skills in the microsurgical treatment of lymphedema were actively stimulated and profited substantially from this course                                       |
| <b>Q29</b>                                                           | I am confident of the level of expertise I gathered through this course                                                                                                           |
| <b>Q30</b>                                                           | I could learn about developing my emphatic skills on approaching patients with lymphedema during this course                                                                      |
| <b>Q31</b>                                                           | I realised that certain approaches I already know can also be applied in microsurgical lymphatic reconstruction                                                                   |
| <b>Q32</b>                                                           | The atmosphere during both practical and theoretical sessions was relaxed                                                                                                         |
| <b>Q33</b>                                                           | During the course, I felt I could ask all the questions I want at any time                                                                                                        |
| <b>Q34</b>                                                           | I felt comfortable during the entire course                                                                                                                                       |
| <b>Q35</b>                                                           | The course was a good opportunity to develop interpersonal skills (e.g. making new friends, engaging in professional and/or parallel subjects to the main thematic of the course) |

|             |                                                                                                                                                                                          |
|-------------|------------------------------------------------------------------------------------------------------------------------------------------------------------------------------------------|
| <b>Q36</b>  | The social evening was held in a relaxed atmosphere which facilitated further interactions with both trainees and instructors                                                            |
| <b>Q37</b>  | My enjoyment during the course outweighed the stress for the planning and attending this meeting                                                                                         |
| <b>Q38</b>  | The overall atmosphere had a positive impact in motivating me to learn during the course                                                                                                 |
| <b>Q39</b>  | During the practical and theoretical sessions I was able to attain the requested level of concentration for efficient learning                                                           |
| <b>Q40</b>  | During instructor demonstrations on cadavers, the atmosphere remained relaxed, everybody know his/her place to enable co-trainees an equal chance to observe and learn                   |
| <b>Q41</b>  | The course was well time-tabled                                                                                                                                                          |
| <b>Q42*</b> | I found the course disappointing, as I have not found what I expected. I could not learn what I came for to learn                                                                        |
| <b>Q43</b>  | Trainee feedback was actively required during case presentation sessions, therefore stimulating patient-oriented learning                                                                |
| <b>Q44</b>  | The course is skilful organised around each participant (e.g. email correspondence, readiness to answer questions and help solving individual issues)                                    |
| <b>Q45</b>  | The registration platform and information package of the course & program are sufficient to allow registration and organisation of the needed study leave                                |
| <b>Q46*</b> | I was to tired to enjoy the course                                                                                                                                                       |
| <b>Q47*</b> | I was really bored during part/whole course                                                                                                                                              |
| <b>Q48</b>  | The accommodation I had during the course was pleasant and enough to grant a good night rest                                                                                             |
| <b>Q49</b>  | The overall social interaction during the course between trainees, instructors and local employees (prosectors, personnel from the anatomy department/venue) can be described as optimal |
| <b>Q50*</b> | I felt lonely and isolated during the course being given the feeling I am there only because I paid for a service                                                                        |
